# Supplementary material for: Predictors of Emergency Department Visits by Persons With Intellectual Disability Experiencing a Psychiatric Crisis
Source: Atypon-hosted journal article supplement (doi:10.1176/appi.ps.201100124), 2012-01-25
Supplement: pss6303_0287_ds.pdf [file pss6303_0287_ds.pdf]

## APPENDIX

### Definition of predisposing, enabling and need variables

| <b>Variables</b>            | <b>Definition</b>                                                                                                                                                                                                                                                                                                                                                                             |
|-----------------------------|-----------------------------------------------------------------------------------------------------------------------------------------------------------------------------------------------------------------------------------------------------------------------------------------------------------------------------------------------------------------------------------------------|
| <i>Predisposing Factors</i> |                                                                                                                                                                                                                                                                                                                                                                                               |
| Level of Disability         | Agencies rated level of disability either as borderline (70+), mild (56-70), moderate (41-55), severe (26-40) or profound (25 and below) based on DSM-IV. For analysis, borderline and mild were merged into one category and moderate, severe and profound were merged into one category.                                                                                                    |
| Age                         | Age was collapsed into 25 year intervals: <25, 25-49, 50+                                                                                                                                                                                                                                                                                                                                     |
| Gender                      | Categorized as female and male                                                                                                                                                                                                                                                                                                                                                                |
| Cultural Background         | Agency staff selected an individual's ethnic background based on one of the following options: Caucasian, African descent, East Indian, Hispanic/Latino, Asian, Aboriginal, unknown, other. For analysis, the variable was then collapsed into 2 categories: Not visible minority (i.e. Caucasian) and visible minority (i.e. African descent, East Indian etc.)                              |
| <i>Enabling Factors</i>     |                                                                                                                                                                                                                                                                                                                                                                                               |
| Type of Residence           | Individuals were identified to be in one of 9 residential services. All low support settings (supported independent living, street, independent, shelter, boarding home) were collapsed into a category labeled <i>minimal support</i> ; individuals living with their families were categorized as family; individuals living in 24 hour staffed group homes were categorized as group home. |
| Access to Primary Care      | From checklist inquiring on clinical services received: Does client have regular primary care access? yes or no                                                                                                                                                                                                                                                                               |
| Access to a Crisis Plan     | From checklist inquiring on clinical services received: Does client have a crisis plan? yes or no.                                                                                                                                                                                                                                                                                            |
| Access to Daytime Activity  | Staff members were asked to select all the day programs the client was involved in from a list of options; the daytime activity category was then collapsed into either: structured activities (sheltered workshop, day program, school, supported employment, and independent employment) or no activities.                                                                                  |
| Access to Counseling        | From checklist inquiring on clinical services                                                                                                                                                                                                                                                                                                                                                 |

|                                                         |                                                                                                                                                                                                                                                                                                                                                                                                                                                                                                                                                                                                                                                                                                                                                                |
|---------------------------------------------------------|----------------------------------------------------------------------------------------------------------------------------------------------------------------------------------------------------------------------------------------------------------------------------------------------------------------------------------------------------------------------------------------------------------------------------------------------------------------------------------------------------------------------------------------------------------------------------------------------------------------------------------------------------------------------------------------------------------------------------------------------------------------|
| Services                                                | received: Does client have regular counseling access? yes or no.                                                                                                                                                                                                                                                                                                                                                                                                                                                                                                                                                                                                                                                                                               |
| Access to Behaviour Therapy                             | From checklist inquiring on clinical services received: Does client have regular behavior therapy access? yes or no.                                                                                                                                                                                                                                                                                                                                                                                                                                                                                                                                                                                                                                           |
| Access to a Psychiatrist                                | From checklist inquiring on clinical services received: Does client have regular psychiatry care access? yes or no.                                                                                                                                                                                                                                                                                                                                                                                                                                                                                                                                                                                                                                            |
| <i>Need Factors</i>                                     |                                                                                                                                                                                                                                                                                                                                                                                                                                                                                                                                                                                                                                                                                                                                                                |
| History of emergency department visit                   | Under the history section of the client background form, staff were asked to report on whether client had been to the emergency department before.                                                                                                                                                                                                                                                                                                                                                                                                                                                                                                                                                                                                             |
| History of involvement with the criminal justice system | Under the history section of the client background form, staff were asked to report on whether the client had previous forensic or legal involvement                                                                                                                                                                                                                                                                                                                                                                                                                                                                                                                                                                                                           |
| History of suicidal behaviour or self injury            | Under the history section of the client background form, staff were asked to report on whether the client had previous suicidal behaviour or self injury                                                                                                                                                                                                                                                                                                                                                                                                                                                                                                                                                                                                       |
| Life Event                                              | Based on 18 life events occurring in past year from Psychiatric Assessment for Adults with Developmental Disabilities Checklist (PAS ADD checklist) with 3 added items: change in roommates, change in client's primary staff/worker, and recent trauma/abuse. Life events were then categorized into 3 groups: no life events, one life event, two or more life events                                                                                                                                                                                                                                                                                                                                                                                        |
| Psychiatric Diagnosis                                   | All psychiatric diagnoses were listed and then tallied. Individuals were categorized as having 1 or more psychiatric diagnosis or no psychiatric diagnosis.                                                                                                                                                                                                                                                                                                                                                                                                                                                                                                                                                                                                    |
| Aggression during the crisis                            | The seriousness of aggression was recorded in the <i>crisis report</i> using the following: 1-Not serious (verbal aggression e.g. threats), 2-Slightly serious (verbal aggression with non-contact behavior e.g. slamming, hitting walls and/or minor property damage), 3-Moderately serious (minor contact behavior e.g. pushing and/or major property damage), 4-Very serious (physical aggression without tissue damage e.g. hitting, kicking, biting), 5- Extremely serious (physical aggression with tissue damage e.g. lacerations, broken). For analysis, groups 1 and 2 were combined to create a <i>not serious</i> category; group 3 was labeled <i>somewhat serious</i> ; and group 4 and 5 were combined to create a <i>very serious</i> category. |
